# Supplementary material for: Molecular Basis and Role of Siglec-7 Ligand Expression on Chronic Lymphocytic Leukemia B Cells
Source: PubMed Central journal article supplement (PMC9195294; doi:10.3389/fimmu.2022.840388), 2022-05-31
Supplement: DataSheet_1.pdf [file DataSheet_1.pdf]

## *Supplementary Material*

### **Supplementary Materials and Methods**

#### *Reagents*

Biotinylated *Maackia amurensis* lectin-II (MAL-II) was obtained from Vector Laboratories (Burlingame, CA, USA). Phycoerythrin-labeled streptavidin was purchased from Jackson ImmunoResearch (West Grove, PA, USA). Anti-oligoNeu5Ac monoclonal antibody (clone 2-2B) was from Merck Millipore (Darmstadt, Germany).

#### *Proximity labeling of JVM-3 cells with Siglec-7-Fc and identification of counter receptor candidates with mass spectrometry-based proteomics*

Identification of Siglec-7 counterreceptors was attempted with proximity labeling as described previously (1). In brief, JVM-3 cells ( $1 \times 10^7$  cells) were incubated with Siglec-7-Fc (10  $\mu$ g) or binding-deficient mutant Siglec-7(R124A)-Fc (10  $\mu$ g) precomplexed with peroxidase-conjugated anti-FLAG M2 antibody (5  $\mu$ g; cat. no. A8592, Sigma) on ice for 30 min. The cells were washed with Tris-buffered saline (TBS; 20 mM Tris-HCl, pH 7.5, 140 mM NaCl) and further incubated with labeling reagent (10  $\mu$ M biotin tyramide, 10 mM H<sub>2</sub>O<sub>2</sub> in TBS) at room temperature for 10 min. The cells were washed with TBS, lysed with lysis buffer (50 mM Tris-HCl buffer, pH 8.0, 150 mM NaCl, 1% Nonidet P-40, 0.5% sodium deoxycholate, 0.1% sodium dodecyl sulfate (SDS), and protease inhibitor cocktail), and biotinylated proteins were purified with Dynabeads MyOne Streptavidin C1 beads (Thermo Fisher Scientific). Captured proteins were eluted by heat denaturation in sample buffer and subjected to short SDS-polyacrylamide gel electrophoresis (SDS-PAGE). Gel areas containing proteins were excised and subjected to in-gel trypsin digestion, as described previously (1). The peptides were extracted, desalted by C18 Zip-tip (Millipore), dissolved in 0.1% formic acid in water and subjected to a nanoAcquity system (Waters, Milford, MA) connected to the Orbitrap Elite hybrid mass spectrometer (Thermo Electron, Bremen, Germany) equipped with a PicoView nanospray interface (New Objective, Woburn, MA). Liquid chromatography was performed with a C18 BEH column with 75  $\mu$ m ID, 25 cm length (Waters, Milford, MA, USA) packed with 1.7  $\mu$ m particles with a pore size of 130 Å, with a segmented gradient in 120 min from 5% to 35% solvent B (acetonitrile with 0.1% formic acid) at a flow rate of 300 nl/min and a column temperature of 35 °C. The mass spectrometer was operated in the data-dependent mode. Briefly, precursor ion scanning was set to 60K at m/z 400 and automatic gain control (AGC) target at 10<sup>6</sup>. The 20 most intense ions with charge states  $\geq 2$  were sequentially isolated for CID MS/MS fragmentation with normalized collision energy of 35% and detection in the linear ion trap (AGC target at 10000) with previously selected ions dynamically excluded for 60 s. Ions with singly and unrecognized charge state were also excluded.

The raw data were processed using Proteome Discoverer 2.1 (Thermo Fisher Scientific), and peptide identification was performed by Mascot (version 2.3.2) and SEQUEST search engines against the Swiss-Prot database (v2015\_12, total 20,193 sequences from human) with a percolator (strict false discovery rate (FDR) of 0.01 and a relaxed FDR of 0.05). The parameter of protein and peptide identification was set as: trypsin with 2 maximum missing cleavage sites, 10 ppm for mass tolerance for precursor ion mass, 0.1 Da for the fragment ion tolerance, and variable modifications including oxidation at methionine (M), carbamidomethyl at cysteine (C), and deamidation at asparagine (N) or glutamine (Q). Label-free quantification was performed using the peak area of each precursor ion calculated from extracted ion chromatogram (XIC) during data processing using the Precursor Ions Area Detector node with mass precision 2 ppm. The abundance of identified protein was calculated from the top three of all unique and razor peptides in Peptide and Protein Quantifier node, and was used to calculate the relative protein abundance between experimental samples. Proteins that were 10 times or more abundant in the labeled sample compared with control sample were considered Siglec-7 ligand candidates. Proteomics dataset was deposited to ProteomeXchange via the PRIDE database (accession number: PXD024690).

### *Cellular O-glycome analysis by LC-MS/MS*

Proteins extracted from  $1 \times 10^7$  harvested JVM-3 cells by sonication in 1% of Triton X-100 were subjected to reduction and alkylation by 10 mM of dithiothreitol and 50 mM of iodoacetic acid for 1 h at 37 °C, and then precipitated in trichloroacetic acid at a final concentration of 10%. The protein pellets were washed by cold acetone to remove detergents and then reconstituted in 50 mM ammonium bicarbonate buffer for overnight trypsin digestion at 37 °C, followed by chymotrypsin at 37 °C for 8 h, and overnight PNGase F treatment at 37 °C twice to release the N-glycans. O-glycans were subsequently released by reductive elimination (1 M of NaBH<sub>4</sub> in 50 mM of NaOH) at 45 °C for 16 h, after which the reaction mixtures were neutralized, loaded onto a C18 Sep-Pak cartridge (Waters) pre-packed with 1 ml of activated Dowex 50W-X8 resin, and the reduced glycans eluted by 5% AcOH. After removal of borates by repeated co-evaporation with 10% acetic acid in methanol, the reduced glycan samples were permethylated and subjected to LC-MS/MS analysis on an Orbitrap Fusion™ Tribrid™ Mass Spectrometer (Thermo Fisher Scientific), as described previously (2), but using instead a ReproSil-Pur 120 C18-AQ column (120Å, 1.9 µm, 75 µm × 200 mm; Dr. Maisch HPLC GmbH, Ammerbuch, Germany) without altering any of the LC conditions and data acquisition methods.

Data analysis were performed manually using the Xcalibur software v2.3. The ion chromatograms of commonly found cores 1 and 2 O-glycans were extracted at 10 ppm for either singly or doubly protonated molecular ions depending on their molecular masses and the exact species detected. The structures of resolved peaks were then assigned by manual interpretation of their corresponding MS/MS data. Each of the identified O-glycan structures was relatively quantified based on the verified peak areas of their respective extracted ion chromatograms and expressed as % total of all quantified O-glycan peaks derived from that sample.

*International Cancer Genome Consortium (ICGC) CLL transcriptomic data analysis*

RNAseq-based transcriptomic datasets for CLL patients (EGAD00001000258 and EGAD00001001443) were downloaded from ICGC data repository, and analyzed using Taiwania 1 supercomputer at National High-performance Computing Center (Hsinchu, Taiwan) and GNU parallel computing (3). RNAseq data for the patients with CLL or small lymphocytic lymphoma and with survival status ( $n = 255$  and  $n = 9$ , respectively; total:  $n = 264$ ) were included in the subsequent analysis, while those for healthy donors, donors with monoclonal B lymphocytosis, and CLL patients without survival status were excluded. Sequencing quality was checked first with fastQC v0.11.8 (4), and paired-end sequencing reads were mapped to human genome (GRCh38) and quantified with Salmon v. 1.0 using quasi-mapping mode, fragment GC bias and positional bias correction, and other default settings (5). The transcriptome count matrices from Salmon were further processed with tximport (6) and DESeq2 (7) to the gene level with an average transcript length offset which was used to control the bias of transcript length using the GLM approach (8). Gene counts greater than 5 and the frequency in the samples greater than 5% were retained for statistical analysis. The gene counts were further normalized with the sample-specific size factors determined by median ratio of gene counts relative to geometric mean per gene across samples using the counts function from DESeq2 to control the bias in sample variation.

The normalized gene expression matrix from aforementioned results was log<sub>2</sub> transformed and analyzed for differential gene expression using DESeq2 with respect to *IGHV* mutation status (9). The data also was analyzed using Chi-square test, Linear logistic regression with binomial distribution, and Cox proportional hazards model using finalfit (10), a R package, with or without clinical variables to assess the association of gene expression and/or clinical variable with mortality. The cutoffs for dichotomizing sample group by gene expression for the association analysis included mean, median, and the optimal cutoff in the Cox proportional hazards model using the cutp function in survMisc (11), a R package. Optimal cutoff determines the value to split the group so that it yields the lowest p value with log-rank test for the two groups fitted in the survival model (12).

## References

1. Chang L, Chen YJ, Fan CY, Tang CJ, Chen YH, Low PY, et al. Identification of Siglec Ligands Using a Proximity Labeling Method. *J Proteome Res.* 2017;16(10):3929-41.
2. Hsiao CT, Wang PW, Chang HC, Chen YY, Wang SH, Chern Y, et al. Advancing a High Throughput Glycotope-centric Glycomics Workflow Based on nanoLC-MS(2)-product Dependent-MS(3) Analysis of Permethylated Glycans. *Mol Cell Proteomics.* 2017;16(12):2268-80.
3. Tange O. GNU Parallel 2018. 2018.
4. Andrews S. FastQC. Ver. 0.11.8. ed2018.

5. Patro R, Duggal G, Love MI, Irizarry RA, Kingsford C. Salmon provides fast and bias-aware quantification of transcript expression. *Nat Methods*. 2017;14(4):417-9.
6. Sonesson C, Love MI, Robinson MD. Differential analyses for RNA-seq: transcript-level estimates improve gene-level inferences. *F1000Res*. 2015;4:1521.
7. Anders S, Huber W. Differential expression analysis for sequence count data. *Genome Biol*. 2010;11(10):R106.
8. Love MI, Sonesson C, Patro R. Swimming downstream: statistical analysis of differential transcript usage following Salmon quantification. *F1000Res*. 2018;7:952.
9. Puente XS, Bea S, Valdes-Mas R, Villamor N, Gutierrez-Abril J, Martin-Subero JI, et al. Non-coding recurrent mutations in chronic lymphocytic leukaemia. *Nature*. 2015;526(7574):519-24.
10. Harrison E, Drake T, Ots R. finalfit: Quickly create elegant regression results tables and plots when modelling. Ver. 1.0.2. ed2020.
11. Dardis C. survMisc: Miscellaneous functions for survival data. Ver. 0.5.5. ed2018.
12. Contal C, O'Quigley J. An application of changepoint methods in studying the effect of age on survival in breast cancer. *Computational Statistics & Data Analysis*. 1999;30(3):253-70.

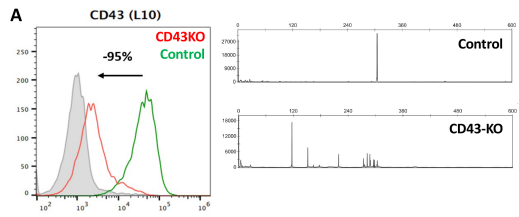

| Sample  | Size (nt) | Indel (nt) | Area   | %   |
|---------|-----------|------------|--------|-----|
| Control | 304.7     | 0          | 285491 | 100 |
| CD43-KO | 117.0     | -188       | 90970  | 27  |
|         | 151.7     | -153       | 41318  | 12  |
|         | 219.2     | -85        | 29433  | 9   |
|         | 273.8     | -31        | 20878  | 6   |
|         | 275.8     | -29        | 11433  | 3   |
|         | 281.7     | -23        | 32815  | 10  |
|         | 287.7     | -17        | 32942  | 10  |
|         | 288.7     | -16        | 19599  | 6   |
|         | 295.7     | -9         | 16857  | 5   |
|         | 297.8     | -7         | 16192  | 5   |
|         | 303.8     | -1         | 21040  | 6   |

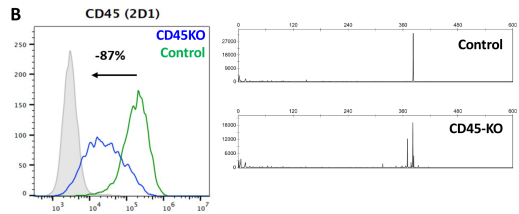

| Sample  | Size (nt) | Indel (nt) | Area   | %   |
|---------|-----------|------------|--------|-----|
| Control | 382.2     | 0          | 355651 | 100 |
| CD45-KO | 315.9     | -66        | 11242  | 4   |
|         | 369.8     | -12        | 93836  | 30  |
|         | 377.8     | -4         | 13505  | 4   |
|         | 381.6     | -1         | 156460 | 50  |
|         | 383.6     | 1          | 35166  | 11  |

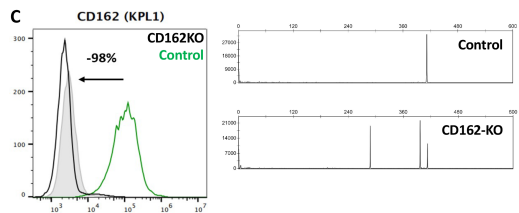

| Sample   | Size (nt) | Indel (nt) | Area   | %   |
|----------|-----------|------------|--------|-----|
| Control  | 411.7     | 0          | 398037 | 100 |
| CD162-KO | 288.0     | -124       | 126018 | 32  |
|          | 396.9     | -15        | 178510 | 45  |
|          | 413.0     | 1          | 92900  | 23  |

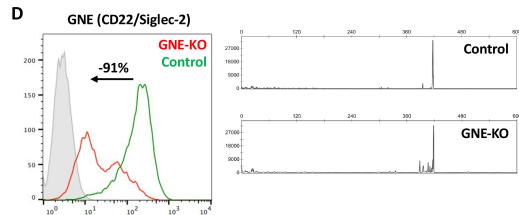

| Sample  | Size (nt) | Indel (nt) | Area   | %  |
|---------|-----------|------------|--------|----|
| Control | 395.4     | -22        | 33976  | 6  |
|         | 417.2     | 0          | 503067 | 85 |
|         | 418.5     | 1          | 53321  | 9  |
| GNE-KO  | 388.3     | -29        | 88883  | 11 |
|         | 395.5     | -22        | 52431  | 6  |
|         | 396.3     | -21        | 34636  | 4  |
|         | 406.5     | -11        | 69681  | 9  |
|         | 410.4     | -7         | 42644  | 5  |
|         | 413.3     | -4         | 27335  | 3  |
|         | 416.4     | -1         | 90892  | 11 |
|         | 418.2     | 1          | 413203 | 50 |

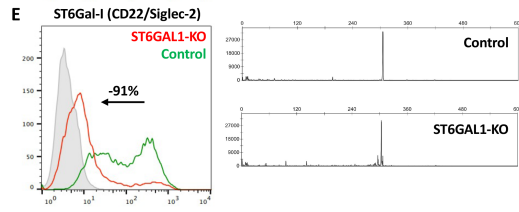

| Sample   | Size (nt) | Indel (nt) | Area   | %   |
|----------|-----------|------------|--------|-----|
| Control  | 305.3     | 0          | 323251 | 100 |
| ST6G1-KO | 296.2     | -9         | 63368  | 11  |
|          | 297.1     | -8         | 26548  | 5   |
|          | 303.5     | -2         | 393100 | 71  |
|          | 304.9     | 0          | 16695  | 3   |
|          | 306.1     | 1          | 17379  | 3   |
|          | 307.0     | 2          | 38588  | 7   |

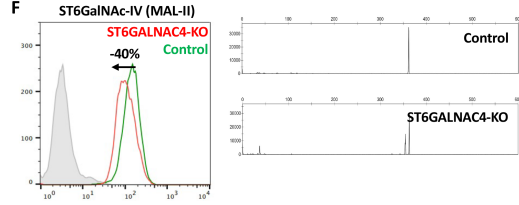

| Sample    | Size (nt) | Indel (nt) | Area   | %   |
|-----------|-----------|------------|--------|-----|
| Control   | 361.9     | 0          | 393918 | 100 |
| ST6GN4-KO | 325.6     | -36        | 9533   | 2   |
|           | 342.7     | -19        | 5770   | 1   |
|           | 354.1     | -8         | 82889  | 14  |
|           | 355.0     | -7         | 153876 | 28  |
|           | 363.2     | 1          | 303547 | 55  |

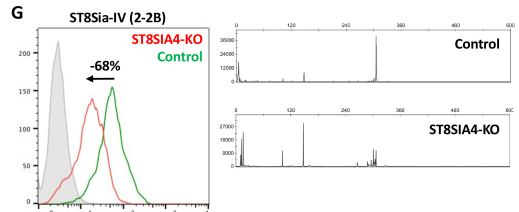

| Sample     | Size (nt) | Indel (nt) | Area   | %  |
|------------|-----------|------------|--------|----|
| Control    | 301.1     | -4         | 26571  | 6  |
|            | 305.6     | 0          | 426090 | 94 |
| ST8SIA4-KO | 266.1     | -39        | 40310  | 10 |
|            | 288.3     | -17        | 29396  | 7  |
|            | 296.3     | -9         | 38888  | 10 |
|            | 301.2     | -4         | 99197  | 25 |
|            | 303.1     | -2         | 27791  | 7  |
|            | 304.1     | -1         | 24858  | 6  |
|            | 305.2     | 0          | 47372  | 12 |
|            | 307.1     | 2          | 88979  | 22 |

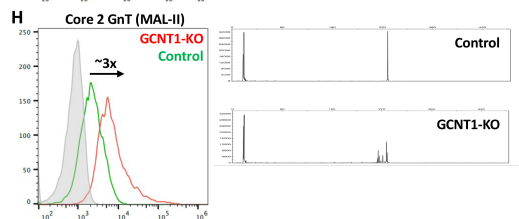

| Sample   | Size (nt) | Indel (nt) | Area   | %   |
|----------|-----------|------------|--------|-----|
| Control  | 279.6     | 0          | 275822 | 100 |
| GCNT1-KO | 262.5     | -17        | 15911  | 6   |
|          | 263.5     | -16        | 45418  | 17  |
|          | 265.4     | -14        | 24870  | 9   |
|          | 268.4     | -11        | 9241   | 3   |
|          | 272.0     | -8         | 33637  | 13  |
|          | 277.9     | -2         | 9835   | 4   |
|          | 278.8     | -1         | 85226  | 32  |
|          | 279.8     | 0          | 40945  | 15  |

**Supplementary Figure 1. Characterization of gene-edited cells by flow cytometry and DNA fragment length analyses.**

JVM-3 cells deficient in (A) CD43 (gene: *SPN*; probe: monoclonal antibody L10), (B) CD45 (gene: *PTPRC*; probe: monoclonal antibody 2D1), (C) CD162/PSGL-1 (gene: *SELPLG*; probe: monoclonal antibody KPL1), (D) GNE (gene: *GNE*; probe: recombinant CD22/Siglec-2-Fc), (E) ST6Gal-I (gene: *ST6GAL1*; probe: recombinant CD22/Siglec-2-Fc), (F) ST6GalNAc-IV (gene: *ST6GALNAC4*; probe: MAL-II), (G) ST8Sia-IV (gene: *ST8SIA4*; probe: monoclonal antibody 2-2B), and MEC-1 cells deficient in (H) Core 2 GlcNAc transferase 1 (gene: *GCNT1*; probe: MAL-II) were characterized by flow cytometry and DNA fragment length analyses.

For flow cytometry (left), the gene-edited and control cells were stained with the antibody or lectin (indicated in parentheses on the title line), with appropriate secondary reagent if necessary, and subjected to flow cytometry. Gray histogram represents control cells stained with negative control probe (isotype-control antibody or secondary reagent alone). For DNA fragment length analysis (center: electropherograms, right: summary tables of DNA fragment lengths), genomic DNA samples extracted from the gene-edited and control cells were subjected to gene-specific PCR with a pair of primers (one FAM-labeled, the other unlabeled; Supplementary Table 3), and the fragment lengths of PCR products were analyzed by capillary electrophoresis. Unedited allele in gene-edited cells (showing the same fragment length as wild-type allele) is highlighted in red characters.

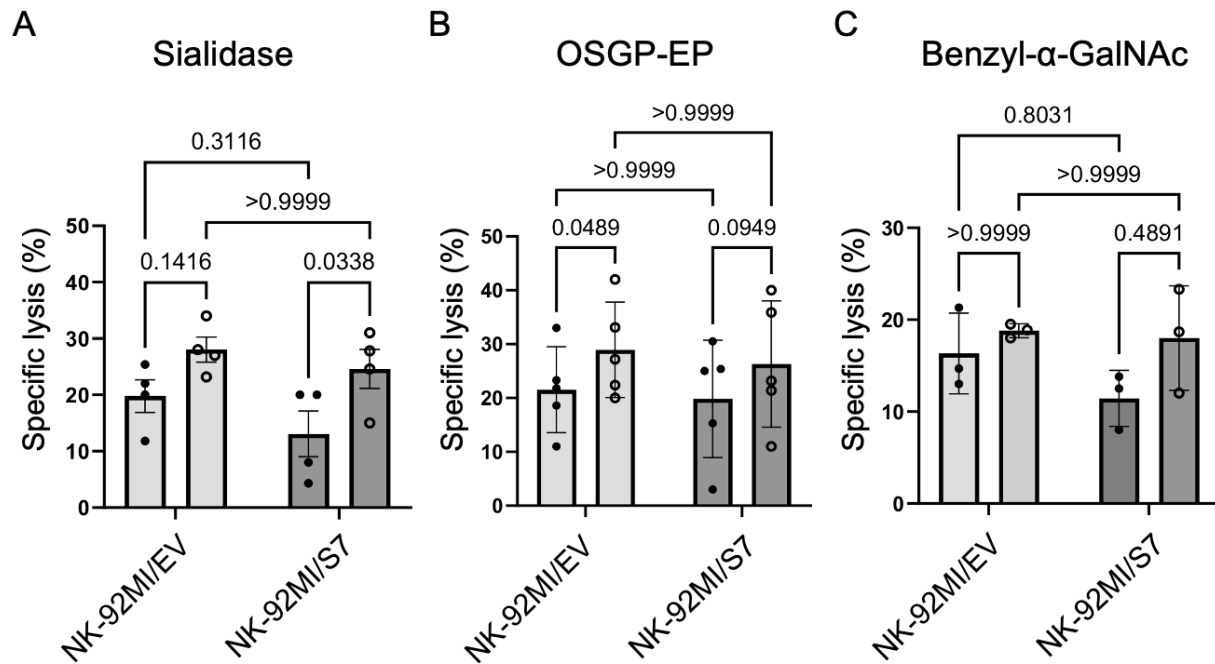

**Supplementary Figure 2. Effects of sialidase, OSGP-EP, and benzyl- $\alpha$ -GalNAc treatment of JVM-3 cells on the NK cytotoxicity by NK-92MI/EV and NK-92MI/S7.**

JVM-3 cells were treated without (solid circle) or with (open circle) (A) sialidase, (B) OSGP-EP, or (C) benzyl- $\alpha$ -GalNAc (72 h) and subjected to NK cytotoxicity assay using NK-92MI/EV and NK-92MI/S7 cells (E:T ratio = 2). NK-92MI/EV cells showed higher cytotoxic activity toward JVM-3 cells compared with NK-92MI/S7, but the difference was not statistically significant, owing to the large experiment-to-experiment deviation and limited number of experimental repeats. All treatments made JVM-3 cells more sensitive to cytotoxicity by both NK-92MI/EV and NK-92MI/S7 cells, and the treatment-induced enhancement of cytotoxicity appeared to be larger when NK-92MI/S7 cells were used as effector cells. However, the difference was not statistically significant in most cases, owing to the large experiment-to-experiment deviation and limited number of experimental repeats.

Cytotoxicity assays were conducted in technical triplicates, and repeated three to five times. Each dot represents an average of technical triplicates. Bars indicate SD of independent experiments. Statistical analyses were conducted by two-way ANOVA followed by Bonferroni's post-hoc test. Numbers above horizontal bars indicate adjusted *P* values.

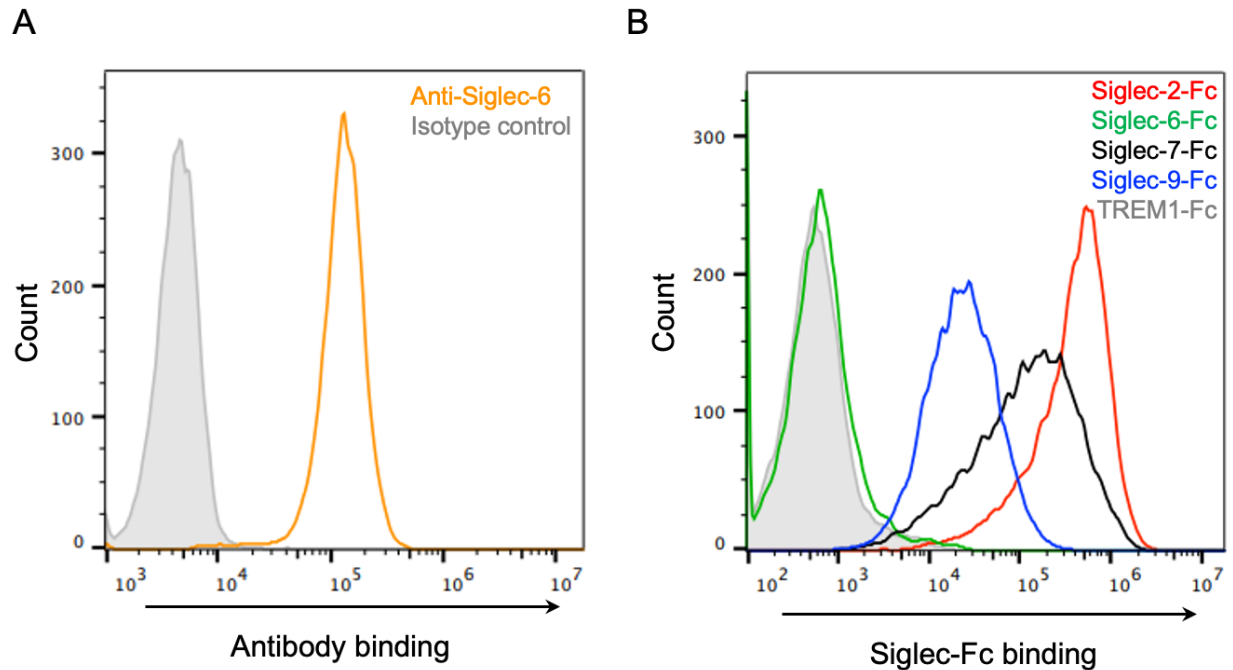

**Supplementary Figure 3. Presence of Siglec-6 on NK-92MI cells and absence of Siglec-6 ligand on JVM-3 cells.**

(A) NK-92MI cell line was stained with an anti-Siglec-6 antibody, followed by a PE-conjugated anti-mouse IgG (115-116-068, Jackson ImmunoResearch), and subjected to flow cytometry. Anti-Siglec-6 antibody (orange; clone 767329, R&D Systems) and isotype control antibody (gray) were used in the experiment. No other Siglec was found to be highly expressed (data not shown). (B) JVM-3 cell line was stained with recombinant Siglec-Fc. CD22/Siglec-2-Fc (red), Siglec-6-Fc (green), Siglec-7-Fc (black), Siglec-9-Fc (blue), and TREM1-Fc (gray, negative control) were used in the experiment.



**Supplementary Table 1.** Summary of Taiwanese patients with chronic lymphocytic leukemia.

| Patient # | Age | Gender (M/F) | IGHV mutation | Siglec-2 binding (MFI) | Siglec-7 binding (MFI) | Siglec-9 binding (MFI) | GCNT1 mRNA (normalized by <i>PGKI</i> ) | ST6GALNA C4 mRNA (normalized by <i>PGKI</i> ) | Binet stage | Rai stage | Treatment           |
|-----------|-----|--------------|---------------|------------------------|------------------------|------------------------|-----------------------------------------|-----------------------------------------------|-------------|-----------|---------------------|
| 1         | 68  | M            | Unmutated     | 39698                  | 31148                  | 8624                   | 9.6E-04                                 | 6.6                                           | A           | 1         | –                   |
| 2         | 56  | F            | ND            | 11817                  | 4939                   | 438                    | ND                                      | ND                                            | B           | 1         | –                   |
| 3         | 66  | F            | ND            | 21561                  | 5700                   | 846                    | ND                                      | ND                                            | C           | 3         | Chemo-immunotherapy |
| 4         | 60  | F            | ND            | 3389                   | 717                    | 311                    | ND                                      | ND                                            | C           | 3         | Chemo-immunotherapy |
| 5         | 55  | F            | ND            | 11662                  | 9172                   | 613                    | ND                                      | ND                                            | A           | 1         | Chemotherapy        |
| 6         | 50  | M            | ND            | 15090                  | 11869                  | 1274                   | ND                                      | ND                                            | A           | 3         | Chemotherapy        |
| 7         | 51  | F            | ND            | 3565                   | 5712                   | 327                    | ND                                      | ND                                            | A           | 1         | –                   |
| 8         | 74  | M            | Mutated       | 3628                   | 6225                   | 247                    | 3.6E-05                                 | 1.0                                           | B           | 1         | –                   |
| 9         | 40  | M            | Unmutated     | 5139                   | 3442                   | 489                    | 7.7E-02                                 | 2.2                                           | B           | 2         | –                   |
| 10        | 68  | F            | Mutated       | 8529                   | 4463                   | 423                    | 1.8E-03                                 | 2.0                                           | B           | 2         | –                   |
| 11        | 77  | F            | Mutated       | 11208                  | 10173                  | 552                    | 0                                       | 1.8                                           | A           | 0         | –                   |
| 12        | 44  | F            | Unmutated     | 17109                  | 16192                  | 828                    | 2.0E-03                                 | 1.4                                           | A           | 1         | –                   |
| 13        | 73  | M            | Mutated       | 2148                   | 1720                   | 196                    | 2.2E-02                                 | 1.7                                           | C           | 4         | –                   |
| 14        | 68  | F            | Unmutated     | 13636                  | 8816                   | 641                    | 1.4E-03                                 | 4.1                                           | A           | 0         | –                   |
| 15        | 63  | F            | ND            | 1866                   | 680                    | 181                    | ND                                      | ND                                            | B           | 1         | –                   |
| 16        | 58  | F            | Mutated       | 10354                  | 8090                   | 379                    | 2.4E-03                                 | 1.5                                           | B           | 1         | –                   |
| 17        | 63  | F            | Mutated       | 9670                   | 7262                   | 869                    | 8.8E-04                                 | 0.7                                           | C           | 4         | –                   |

ND: not determined; –: not treated.

**Supplementary Table 2.** TaqMan reagents used for quantitative real-time polymerase chain reaction analyses.

| Gene              | Assay ID      |
|-------------------|---------------|
| <i>PGK1</i>       | Hs99999906_m1 |
| <i>GCNT1</i>      | Hs01922706_s1 |
| <i>SPN</i>        | Hs01872322_s1 |
| <i>PTPRC</i>      | Hs04189704_m1 |
| <i>SELPLG</i>     | Hs04276253_m1 |
| <i>ST3GAL1</i>    | Hs00161688_m1 |
| <i>ST3GAL2</i>    | Hs00199480_m1 |
| <i>ST3GAL3</i>    | Hs00544033_m1 |
| <i>ST3GAL4</i>    | Hs00272170_m1 |
| <i>ST3GAL5</i>    | Hs01105377_m1 |
| <i>ST3GAL6</i>    | Hs01048197_m1 |
| <i>ST6GALNAC1</i> | Hs00300842_m1 |
| <i>ST6GALNAC2</i> | Hs01032565_m1 |
| <i>ST6GALNAC3</i> | Hs00541761_m1 |
| <i>ST6GALNAC4</i> | Hs00205241_m1 |
| <i>ST6GALNAC5</i> | Hs00229612_m1 |
| <i>ST6GALNAC6</i> | Hs00203739_m1 |
| <i>ST8SIA1</i>    | Hs00268157_m1 |
| <i>ST8SIA2</i>    | Hs00916611_m1 |
| <i>ST8SIA3</i>    | Hs01026908_m1 |
| <i>ST8SIA4</i>    | Hs00379924_m1 |
| <i>ST8SIA5</i>    | Hs00203298_m1 |
| <i>ST8SIA6</i>    | Hs02341873_m1 |

**Supplementary Table 3.** Sequences of sgRNA for CRISPR/Cas9 gene editing and PCR primers for DNA fragment length analyses.

| Gene                   | SgRNA sequence           | Forward primer            | Reverse primer             | PCR product (bp) | Annealing temperature (°C) |
|------------------------|--------------------------|---------------------------|----------------------------|------------------|----------------------------|
| <i>SPN</i>             | GGCTCGCTAGTA<br>GAGACCAA | TCTTGCTCCTGCC<br>TGTTTGC  | AGGTTGTTGGCTC<br>AGGTAAAGG | 309              | 62                         |
| <i>PTPRC</i>           | GCTTGGGTGGAA<br>GTATTGTC | GCAAAGATGCCC<br>AGTGTTC   | TCCACTCCCTAAC<br>AACATGC   | 386              | 62                         |
| <i>SELPLG</i>          | GGCCAGTAGGA<br>TCAGCAAC  | CCAAGGGTGAAA<br>CTGTCTTG  | TCTCCATAGCTGCT<br>GAATCC   | 415              | 61                         |
| <i>ST6GAL<br/>1</i>    | GCCCCAGACTCT<br>TTAACACC | GAAAAAGTTCAG<br>CTGCTGCG  | TTTGCAGCCTAGG<br>GATAAGG   | 311              | 59                         |
| <i>ST6GAL<br/>NAC4</i> | GCTCATCATCCT<br>GTGCTCCG | GCTTGGCATCCCC<br>AGGTAAG  | ACTCACCTTCCCAT<br>CTGGCA   | 364              | 63                         |
| <i>ST8SIA4</i>         | GACCAGGAGACG<br>CAACTCAT | GCTCTCCTCGCAT<br>TTTACAG  | CTAACCATCACTCT<br>ACCCTC   | 311              | 56                         |
| <i>GCNT1</i>           | GGCTGAGGACGT<br>TGCTGCGA | CATTTCAAGATGC<br>CGTTGCAG | CAGCAAGCTCCAA<br>GTGTCTGA  | 281              | 65                         |
| <i>GNE</i>             | GTTAATGCCAAA<br>CATGATCG | TCACACATAAGT<br>GGAGGTGC  | TCCTTCTAGCACAC<br>TGTTGC   | 412              | 59                         |
| Control                | GCGAGGTATTCG<br>GCTCCGCG | –                         | –                          | –                | –                          |

**Supplementary Dataset 1.** Proteins identified as Siglec-7 counterreceptor candidates by proximity labeling and mass spectrometry. (Please see separate Excel file)
